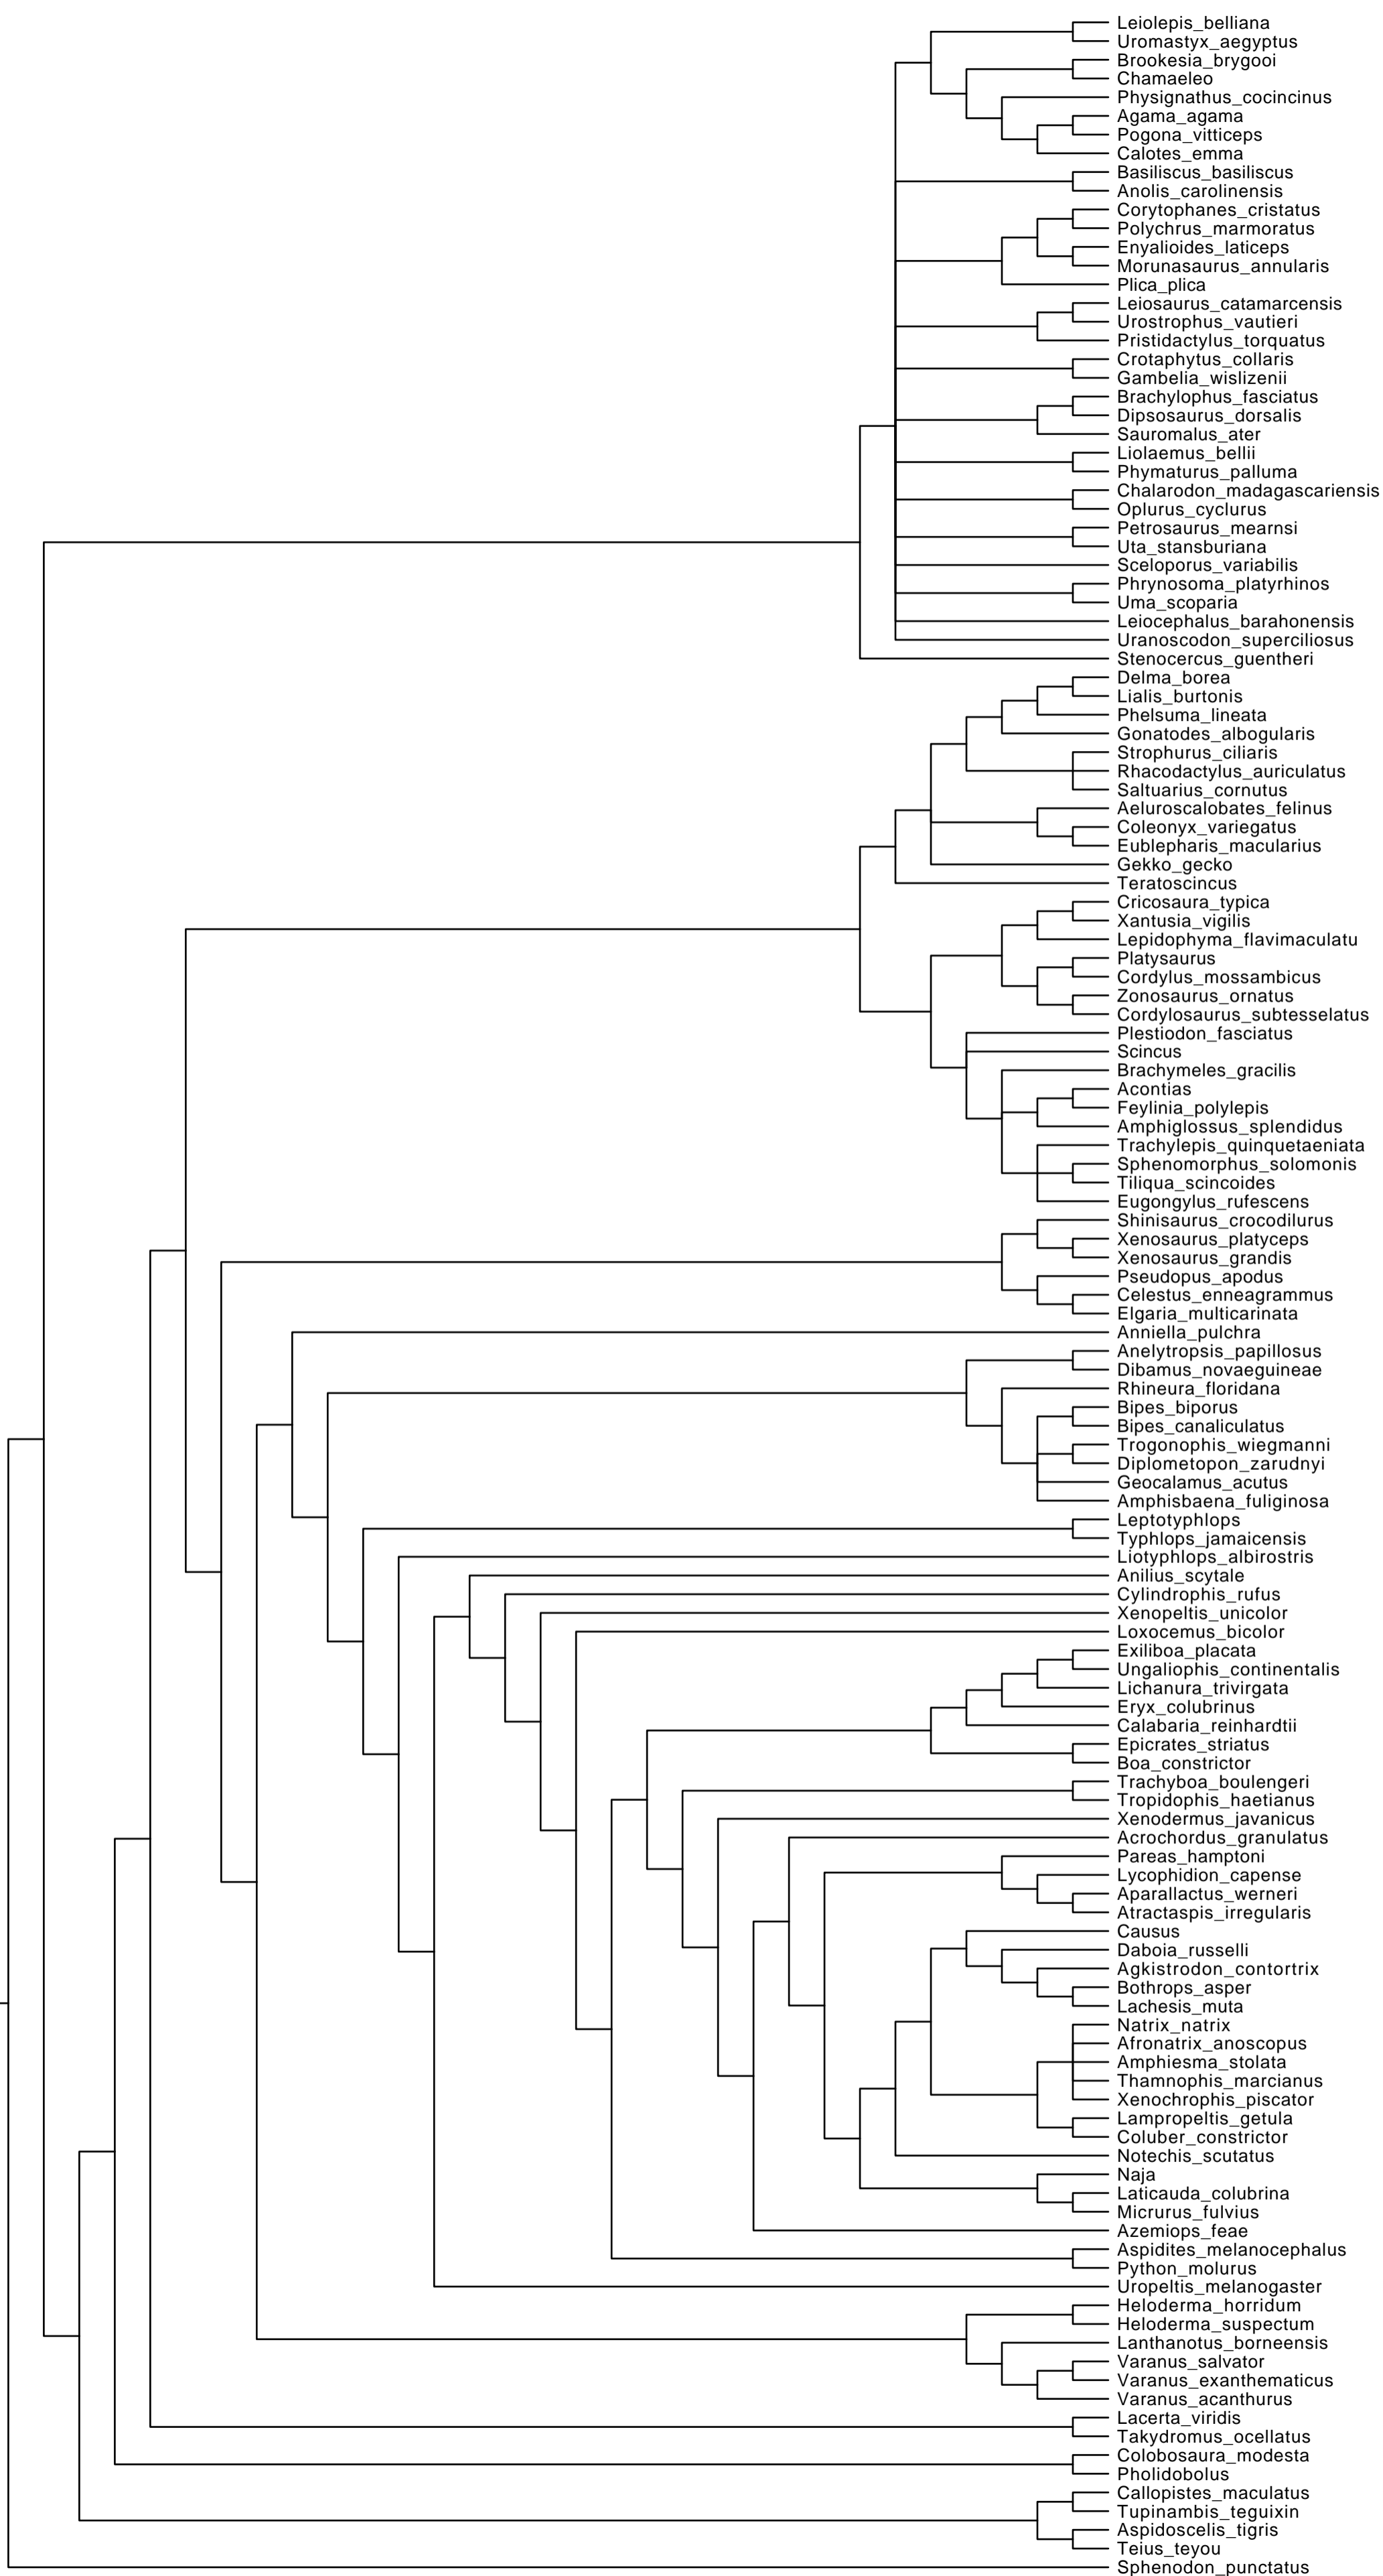

4.0
