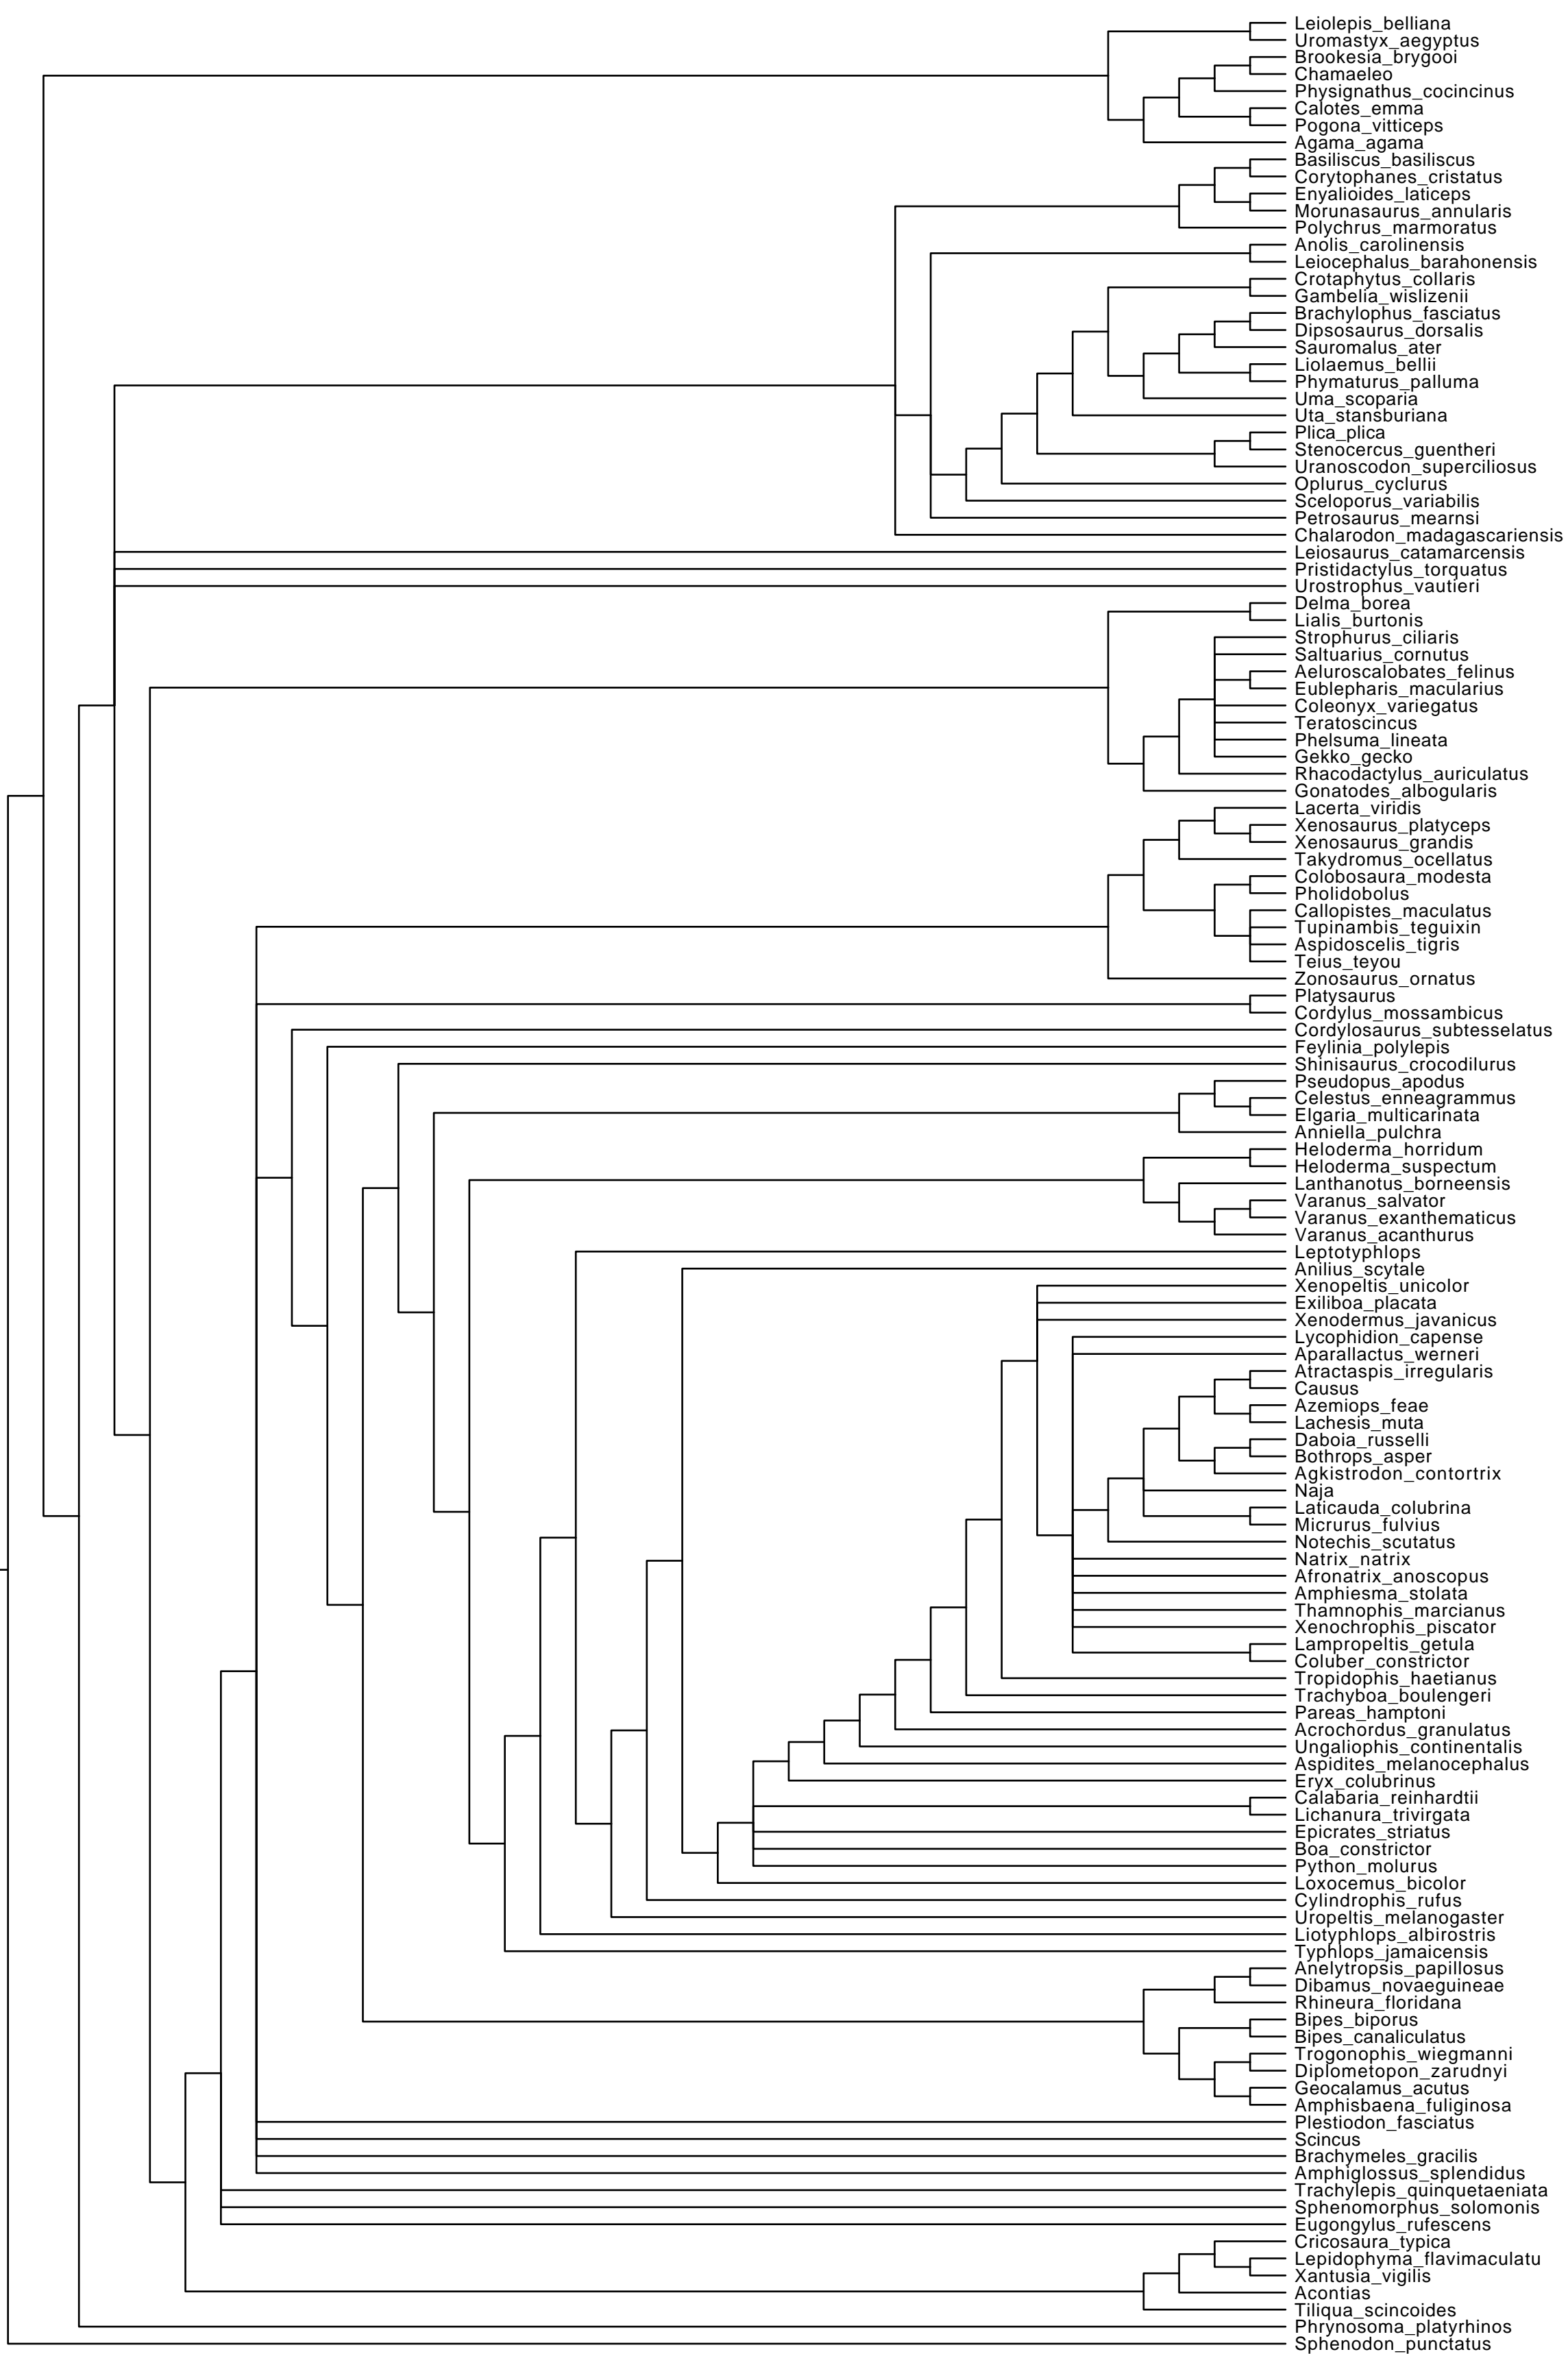

Source: https://storage.googleapis.com/plos-corpus-prod/10.1371/journal.pone.0118199/1/pone.0118199.s055.pdf
