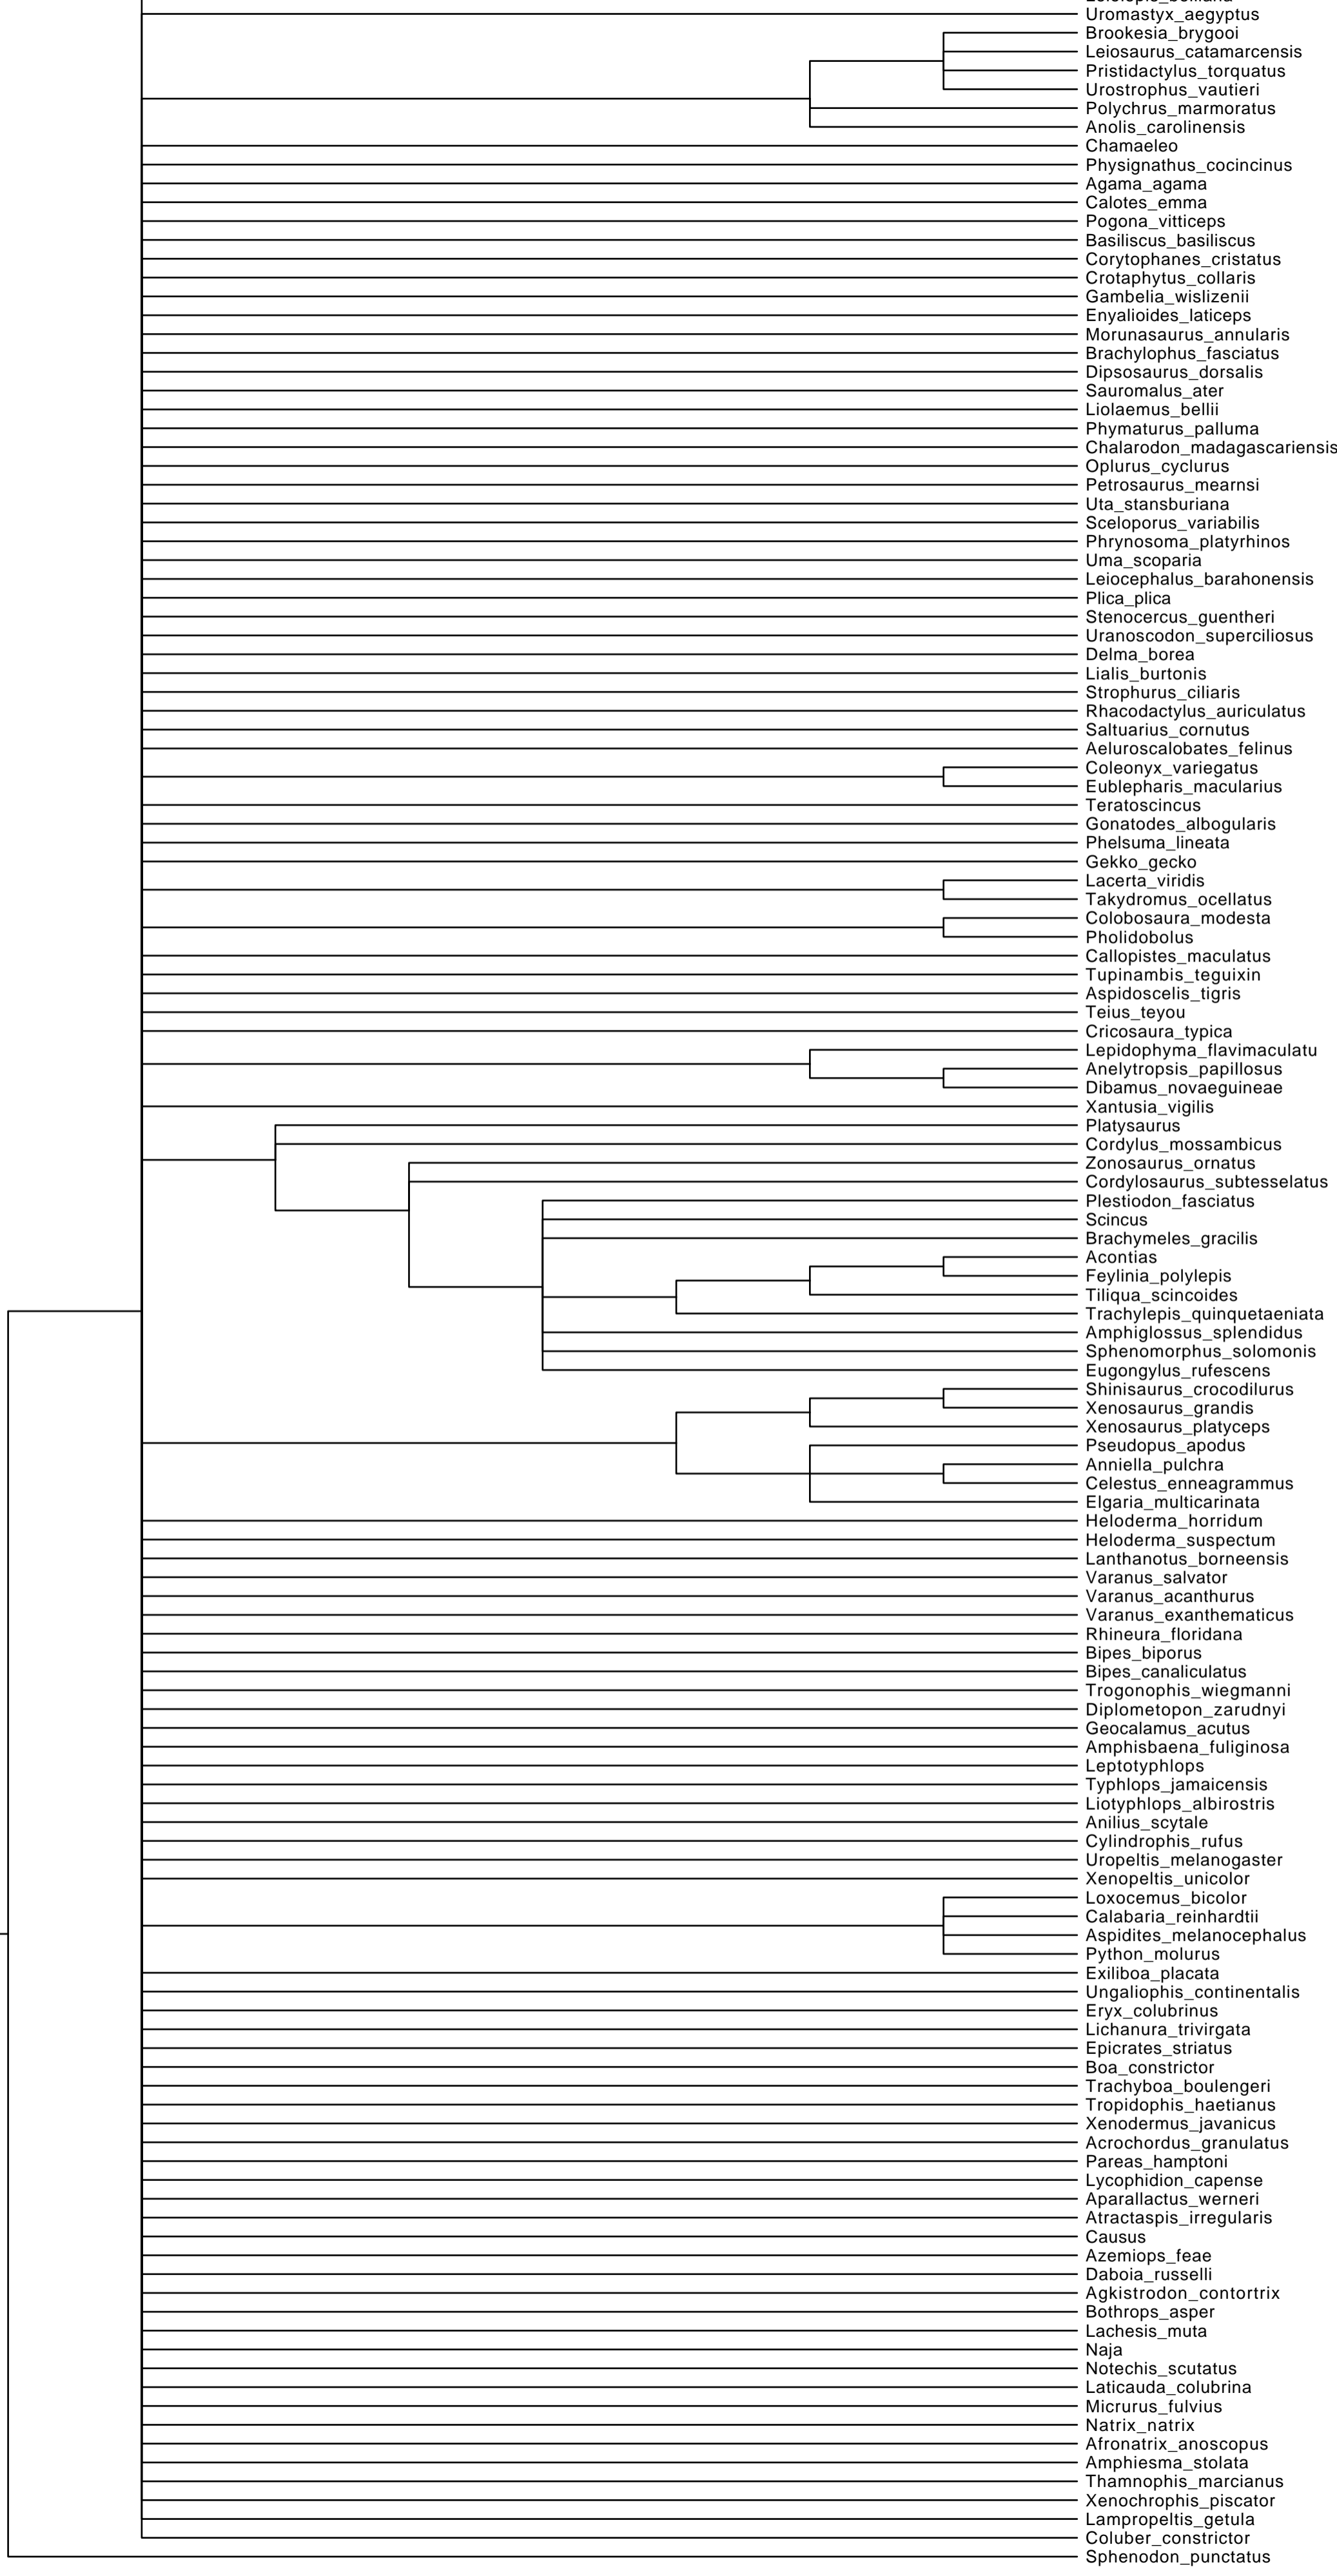

0.8
