/----- Sphenodon puncta(1)  
 |-----  
 +----- Leiolepis bellia(2)  
 |-----  
 +----- Uromastyx aegypt(3)  
 |-----  
 |----- /----- Brookesia brygoo(4)  
 |----- |-----  
 |----- +----- Leiosaurus catam(14)  
 |----- +-----  
 |----- 52-----+----- Pristidactylus t(15)  
 |----- |-----  
 |----- \----- Urostrophus vaut(16)  
 |-----  
 +----- Chamaeleo(5)  
 |-----  
 +----- Physignathus coc(6)  
 |-----  
 +----- Agama agama(7)  
 |-----  
 +----- Calotes emma(8)  
 |-----  
 +----- Pogona vitticeps(9)  
 |-----  
 +----- Basiliscus basil(10)  
 |-----  
 +----- Corytophanes cri(11)  
 |-----  
 +----- Polychrus marmor(12)  
 |-----  
 +----- Anolis carolinen(13)  
 |-----  
 +----- Crotaphytus coll(17)  
 |-----  
 +----- Gambelia wislize(18)  
 |-----  
 +----- Enyalioides lati(19)  
 |-----  
 +----- Morunasaurus ann(20)  
 |-----  
 +----- Brachylophus fas(21)  
 |-----  
 +----- Dipsosaurus dors(22)  
 |-----  
 +----- Sauromalus ater(23)  
 |-----  
 +----- Liolaemus bellii(24)  
 |-----  
 +----- Phymaturus pallu(25)  
 |-----  
 +----- Chalarodon madag(26)  
 |-----  
 +----- Oplurus cyclurus(27)  
 |-----  
 +----- Petrosaurus mear(28)  
 |-----  
 +----- Uta stansburiana(29)  
 |-----  
 +----- Sceloporus varia(30)  
 |-----  
 +----- Phrynosoma platy(31)  
 |-----  
 +----- Uma scoparia(32)  
 |-----  
 +----- Leiocephalus bar(33)  
 |-----  
 +----- Plica plica(34)  
 |-----  
 +----- Stenocercus guen(35)  
 |-----  
 +----- Uranoscodon supe(36)  
 |-----

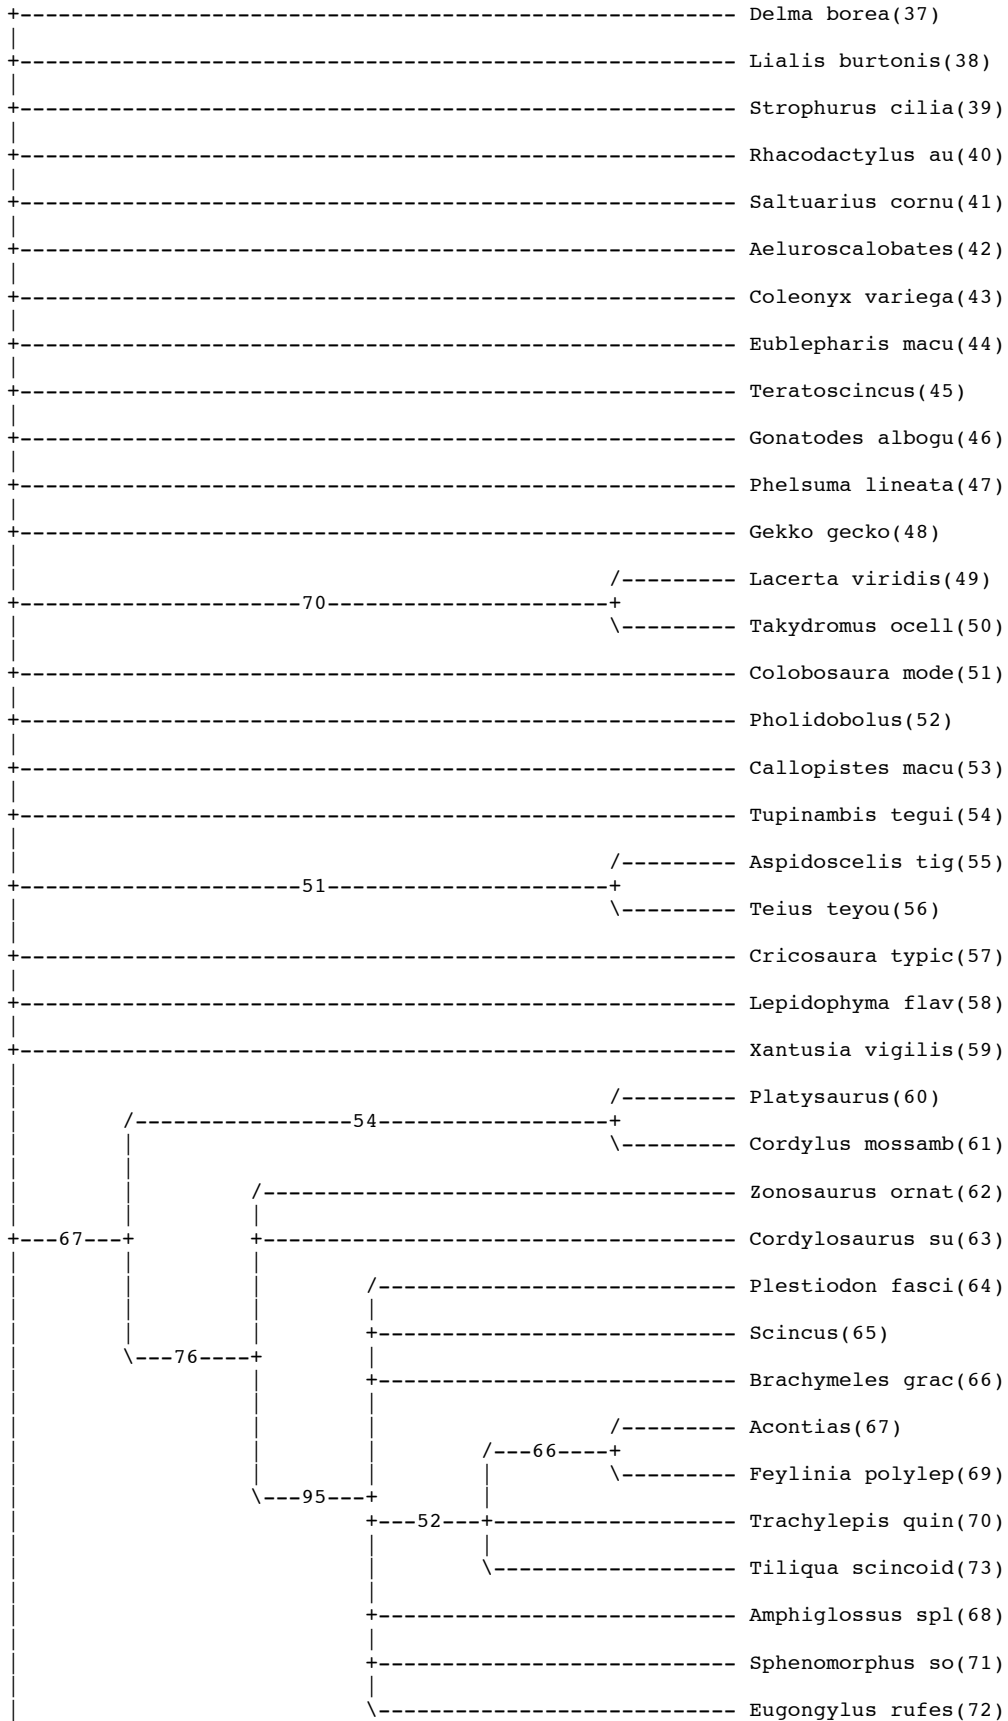

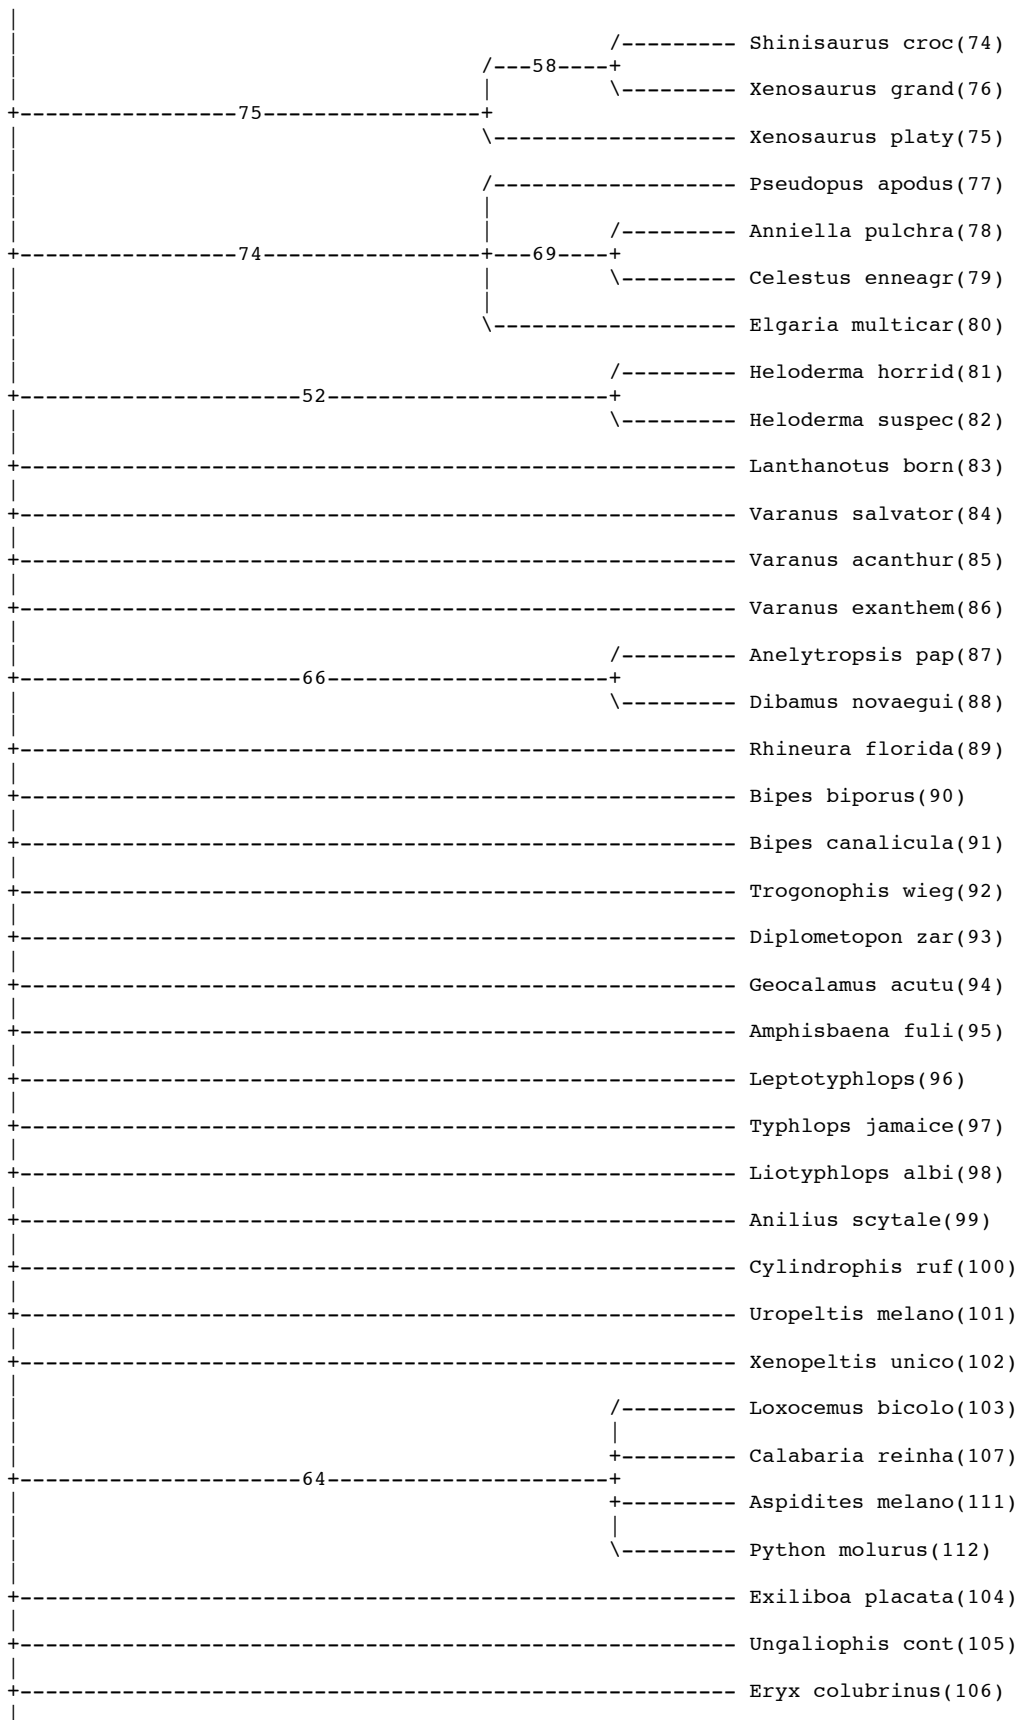

+----- Lichanura trivir(108)  
|  
+----- Epicrates striat(109)  
|  
+----- Boa constrictor(110)  
|  
+----- Trachyboa boulen(113)  
|  
+----- Tropidophis haet(114)  
|  
+----- Xenodermus javan(115)  
|  
+----- Acrochordus gran(116)  
|  
+----- Pareas hamptoni(117)  
|  
+----- Lycophidion cape(118)  
|  
+----- Aparallactus wer(119)  
|  
+----- Atractaspis irre(120)  
|  
+----- Causus(121)  
|  
+----- Azemiops feae(122)  
|  
+----- Daboia russelli(123)  
|  
+----- Agkistrodon cont(124)  
|  
+----- Bothrops asper(125)  
|  
+----- Lachesis muta(126)  
|  
+----- Naja(127)  
|  
+----- Notechis scutatu(128)  
|  
+----- Laticauda colubr(129)  
|  
+----- Micrurus fulvius(130)  
|  
+----- Natrrix natrrix(131)  
|  
+----- Afronatrix anosc(132)  
|  
+----- Amphiesma stolat(133)  
|  
+----- Thamnophis marci(134)  
|  
+----- Xenochrophis pis(135)  
|  
+----- Lampropeltis get(136)  
|  
+----- Coluber constrict(137)
