# Supplementary material for: Integrated Analyses Resolve Conflicts over Squamate Reptile Phylogeny and Reveal Unexpected Placements for Fossil Taxa
Source: PLOS journal article supplement (doi:10.1371/journal.pone.0118199), 2015-03-24
Supplement: S8 (10.1371/journal.pone.0118199.s008) [file journal.pone.0118199.s008]

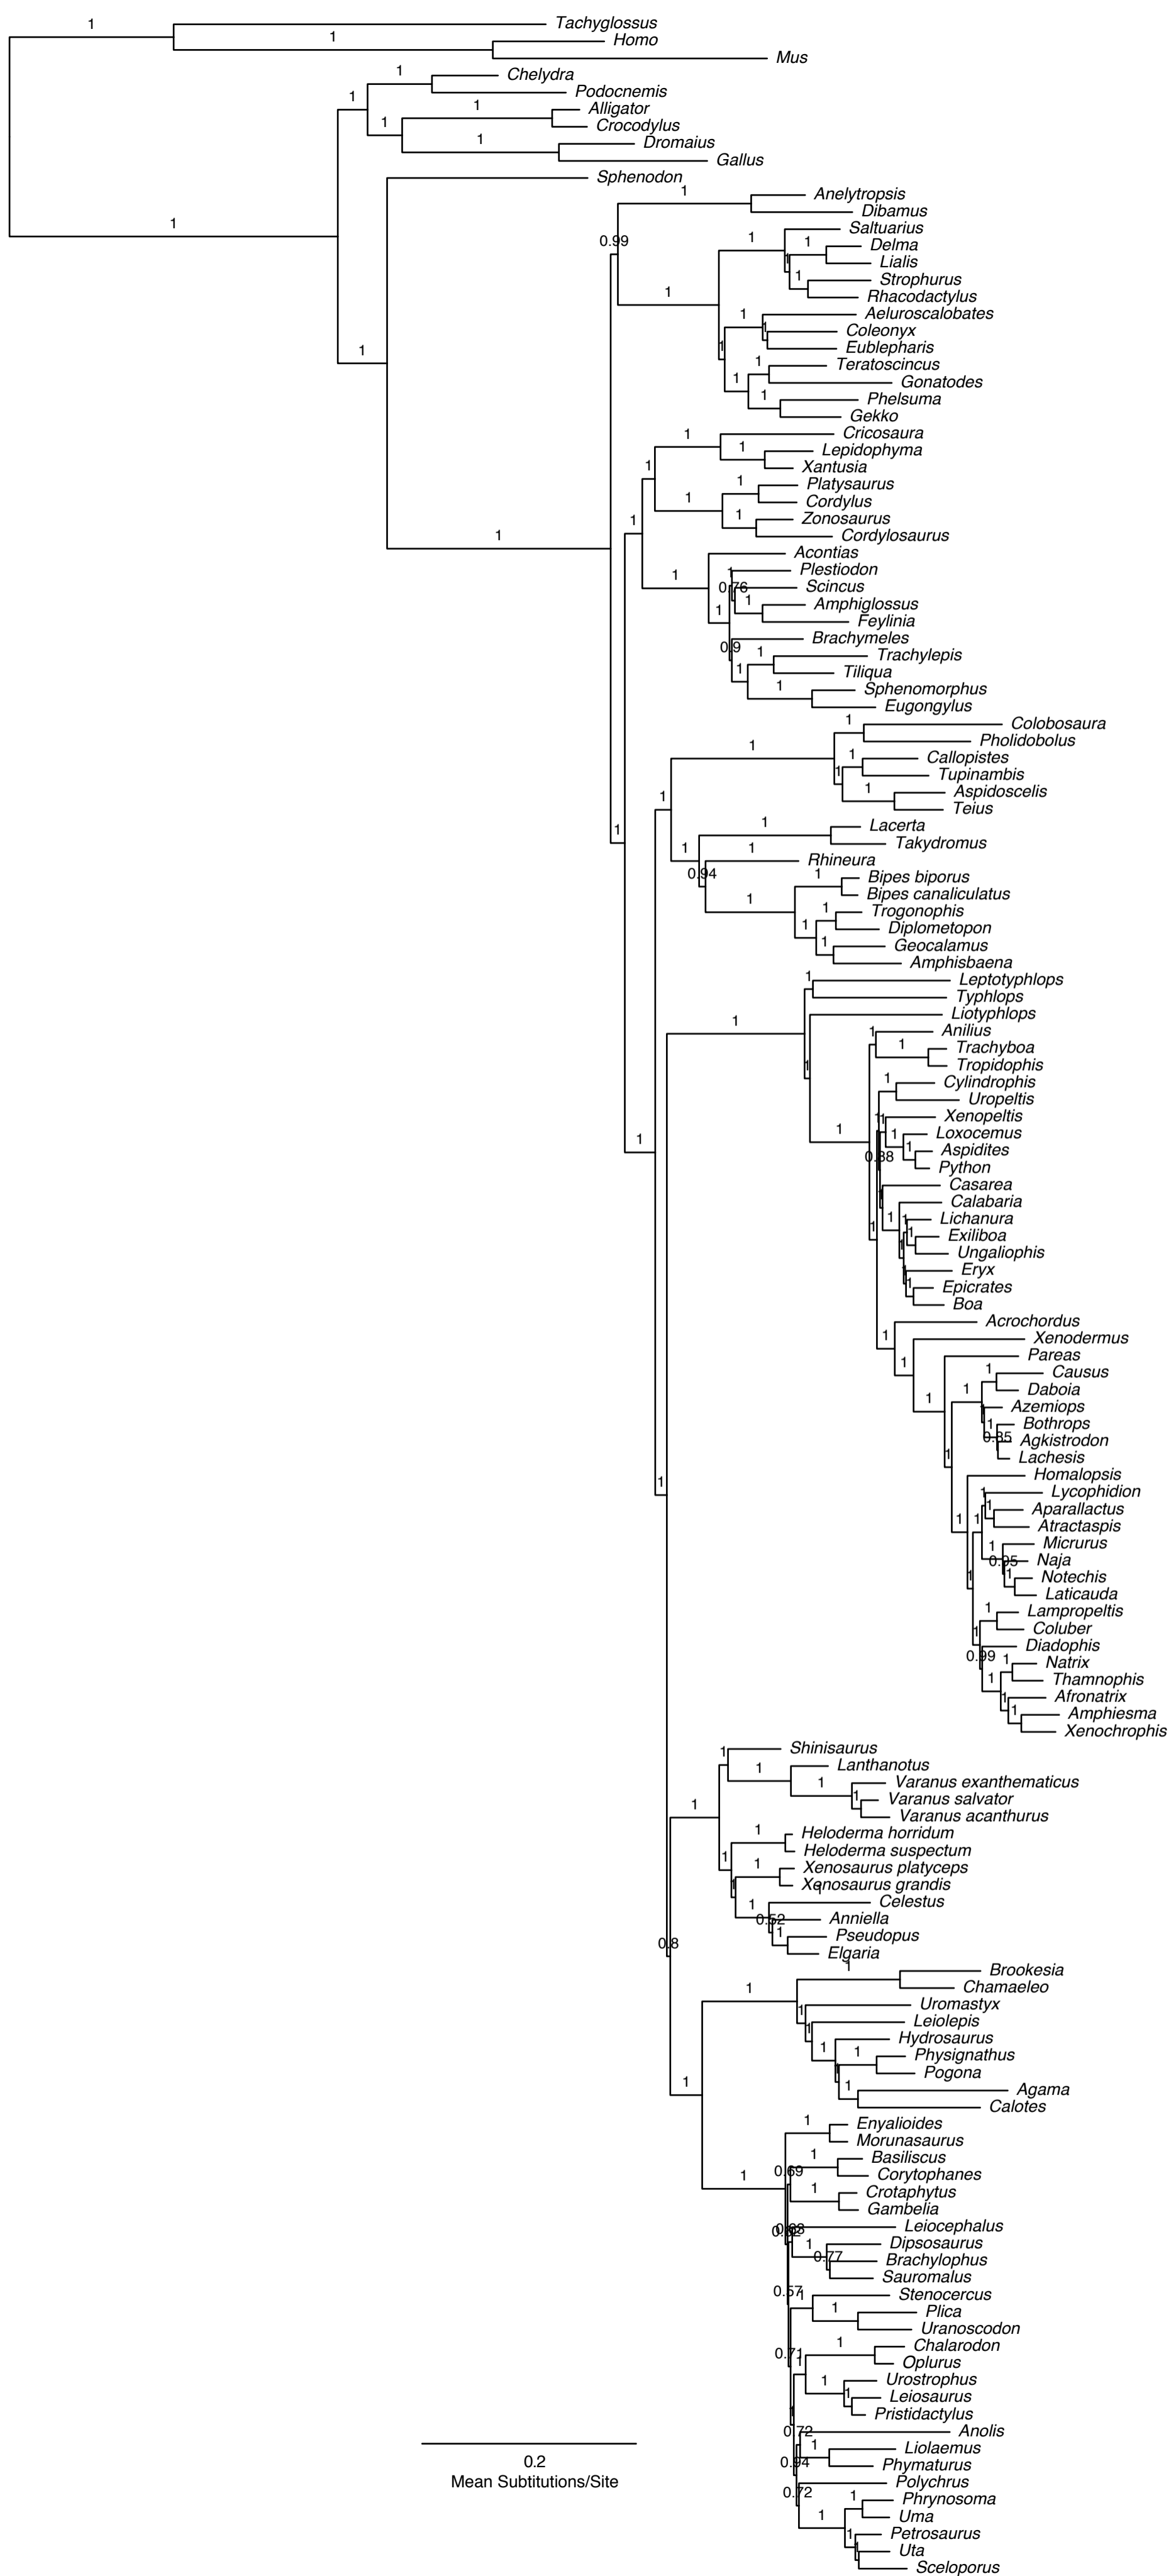

0.2  
Mean Substitutions/Site
